# Supplementary material
Source: PubMed Central journal article supplement (PMC7528620)

### INCB054329

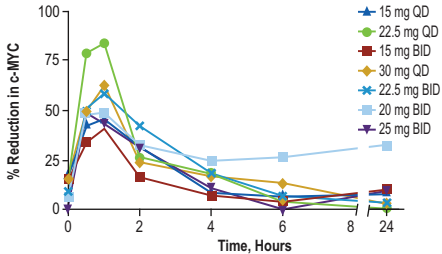

### INCB057643

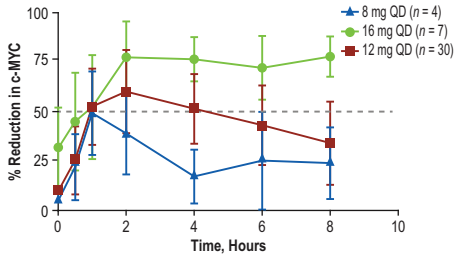

Supplement: NIHMS1606807-supplement-SuppFig.pdf [file NIHMS1606807-supplement-SuppFig.pdf]

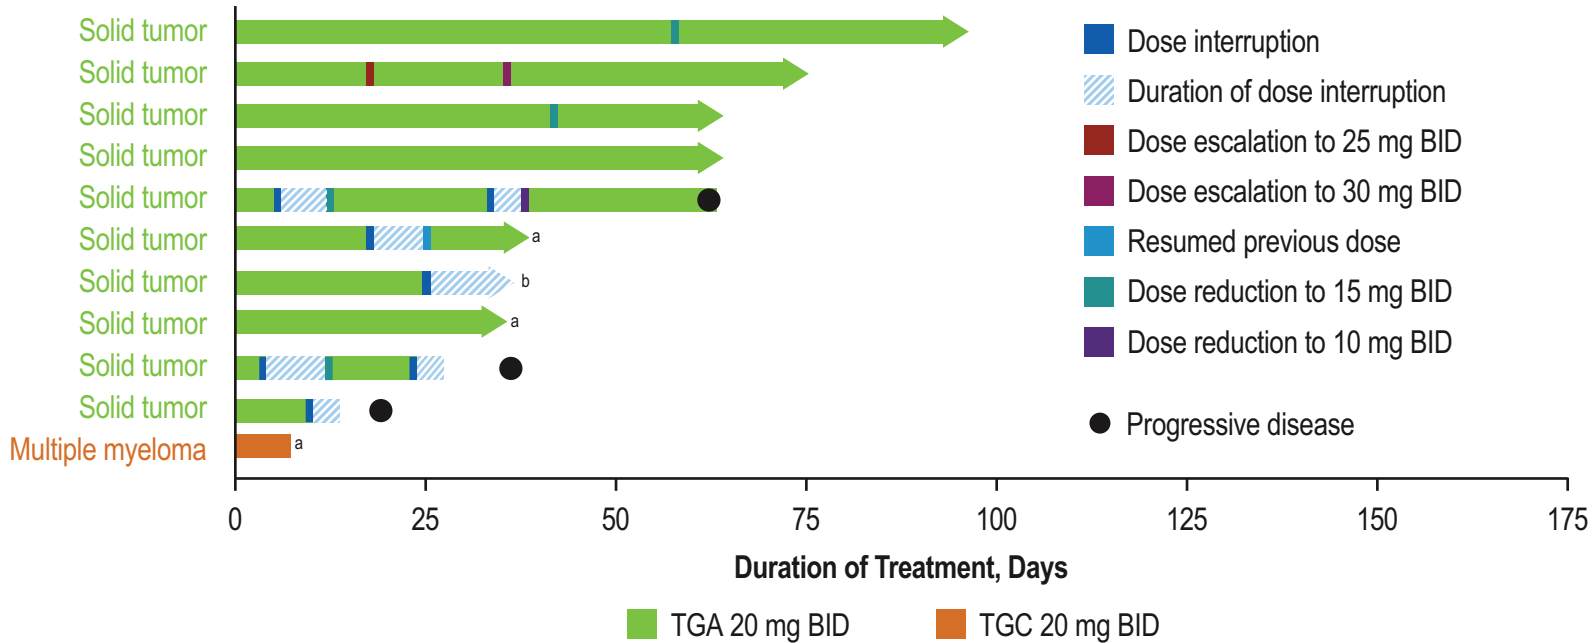

Supplement: NIHMS1606807-supplement-SuppFig2.pdf [file NIHMS1606807-supplement-SuppFig2.pdf]
